# Supplementary material
Source: MDPI journal article supplement (https://www.mdpi.com/2227-7102/13/3/307)
Supplement: s1 [file s1]

1. Mrs. Smyte records the number of people in the school auditorium every hour during a school day. The data she collects show a maximum of 325 people in the auditorium. Which of the following is an appropriate scale for the vertical axis of the line graph for these data?

- a. 7 increments with each increment representing 40 people
- b. 10 increments with each increment representing 35 people
- c. 15 increments with each increment representing 20 people
- d. 20 increments with each increment representing 12 people

2. A student collects apples over a 5-day period.

| Day | Apples |
|-----|--------|
| 1   | 5      |
| 2   | 6      |
| 3   | 4      |
| 4   | 3      |
| 5   | 7      |

*What is the mean number of apples that the student collected?*

3. Using a protractor and a ruler, build a triangle with an interior angle of  $45^\circ$  and a side length of 5 cm.

*Show your work.*

## 4. Which shows a transformation that matches its title?

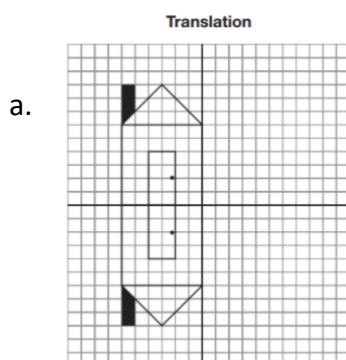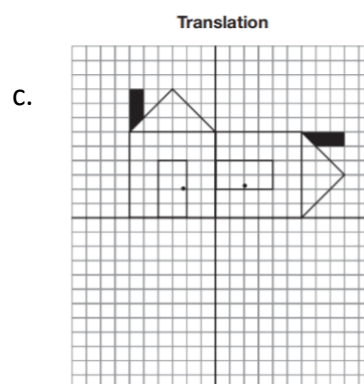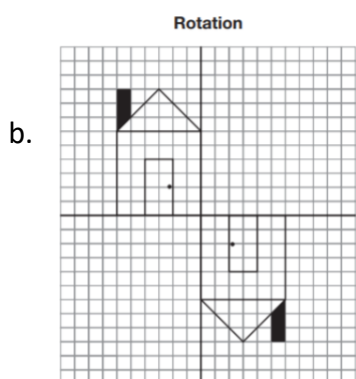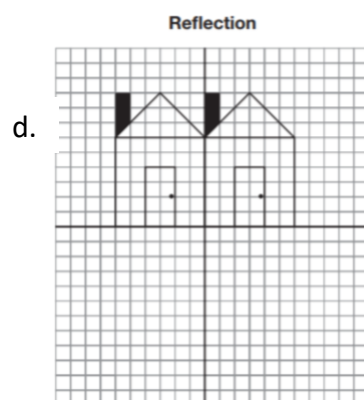

## 5. Ms. Vanstone asks her students to draw a rectangle and a square with the areas and perimeters given below.

|           | Rectangle          | Square             |
|-----------|--------------------|--------------------|
| Area      | 12 cm <sup>2</sup> | 25 cm <sup>2</sup> |
| Perimeter | 16 cm              | 20 cm              |

Which shows two correct drawings?

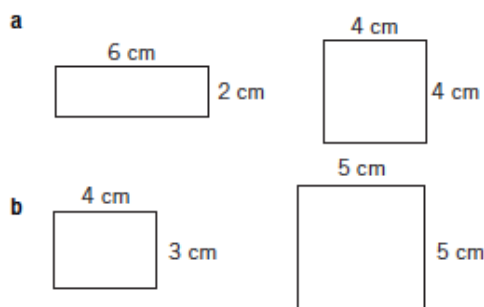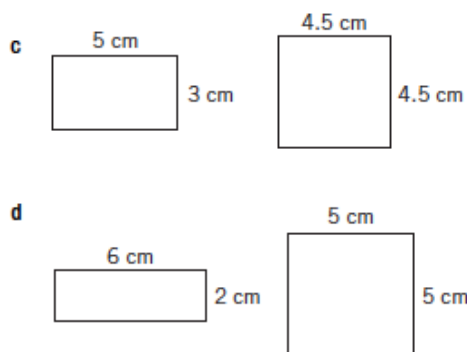

6. Which is the most appropriate unit of measurement to describe the area of the floor of a gym?

- a.  $\text{km}^2$
- b.  $\text{cm}^3$
- c.  $\text{m}^2$
- d.  $\text{m}^3$

7. How many minutes are in a day?

- a. 1 440 minutes
- b. 84 minutes
- c. 7 20 minutes
- d. 3 600 minutes

8. Look at the numbers below.

$$\frac{12}{8}, \frac{5}{8}, \frac{18}{8}, 1\frac{7}{8}$$

*Which list shows these numbers order from smallest to greatest?*

- a.  $\frac{5}{8}, \frac{12}{8}, 1\frac{7}{8}, \frac{18}{8}$
- b.  $\frac{5}{8}, \frac{12}{8}, \frac{18}{8}, 1\frac{7}{8}$
- c.  $\frac{12}{8}, \frac{5}{8}, 1\frac{7}{8}, \frac{18}{8}$
- d.  $\frac{12}{8}, \frac{18}{8}, \frac{5}{8}, 1\frac{7}{8}$

(turn to the following page...)

9. The terms of a pattern are made using toothpicks. Term 1 and Term 5 are not shown.

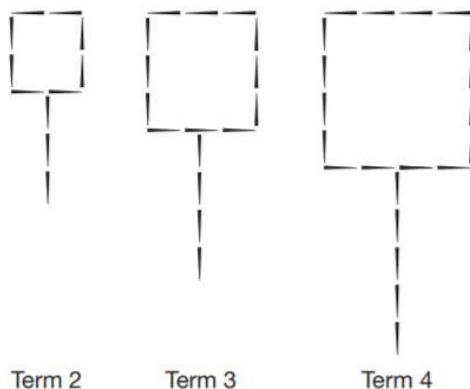

a. How many toothpicks are used to build the first term?

b. How many tooth picks are used to build the 5<sup>th</sup> term?

c. How many toothpicks are used to build the 10<sup>th</sup> term?
