# Supplementary material
Source: MDPI journal article supplement (https://www.mdpi.com/2227-7102/13/3/307)
Supplement: s1 [file s1]

1. The heights of the 5 starting players on a basketball team are shown in the table below:

| Starting Players' Heights |        |
|---------------------------|--------|
|                           | 164 cm |
|                           | 168 cm |
|                           | 178 cm |
|                           | 180 cm |
|                           | 180 cm |

*What is the mean height of the five starting players?*

- a. 138 cm
  - b. 174 cm
  - c. 178 cm
  - d. 180 cm
2. Mrs. Smyte records the number of people in the school auditorium every hour during a school day. The data she collects show a maximum of 325 people in the auditorium. Which of the following is an appropriate scale for the vertical axis of the line graph for these data?
- a. 7 increments with each increment representing 40 people
  - b. 10 increments with each increment representing 35 people
  - c. 15 increments with each increment representing 20 people
  - d. 20 increments with each increment representing 12 people
3. Using a protractor and a ruler, construct a parallelogram with an angle measure of  $115^\circ$  and sides with lengths of 7 cm and 6 cm. Mark on the parallelogram the length of each side and the measure of all.

Show your work.

4. Mr. Lee moves a gym mat using the following four transformations.

- i. Rotate the gym mat 90° clockwise about Point C.
- ii. Translate the gym mat 8 units to the right.
- iii. Translate the gym mat 6 units up.
- iv. Reflect the gym mat over line AB.

On the grid below, show the new location of the gym mat after Mr. Lee makes the four transformations.

Show all your work.

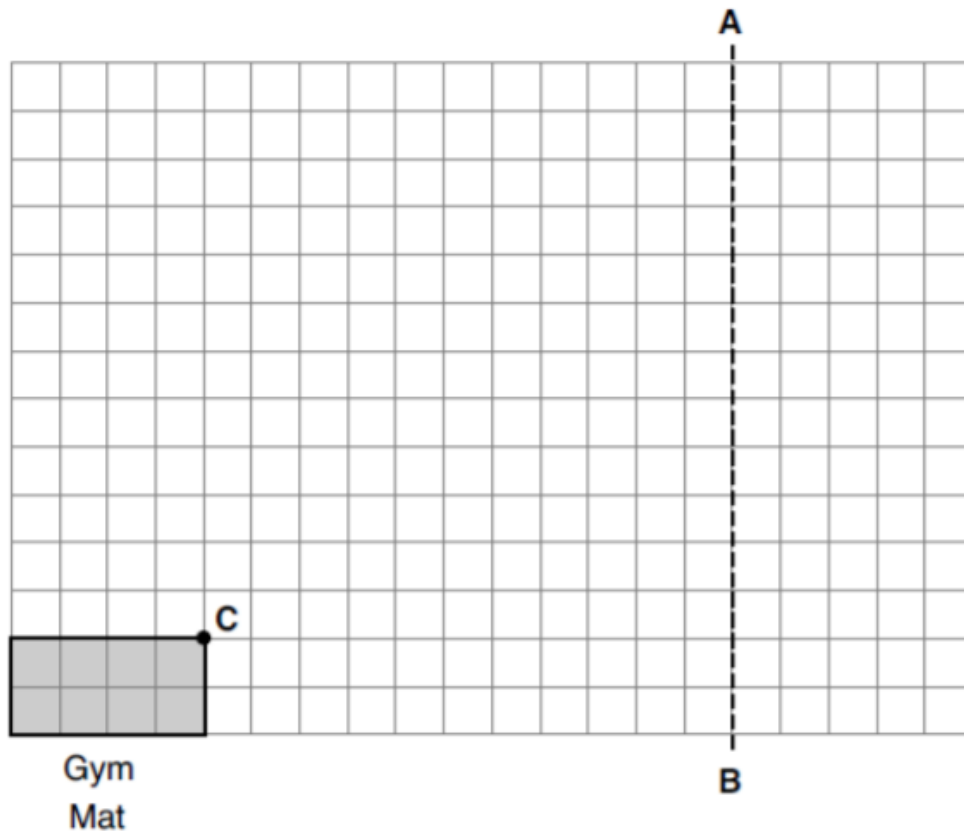

5. Ms. Vanstone asks her students to draw a rectangle and a square with the areas and perimeters given below.

|           | Rectangle          | Square             |
|-----------|--------------------|--------------------|
| Area      | 12 cm <sup>2</sup> | 25 cm <sup>2</sup> |
| Perimeter | 16 cm              | 20 cm              |

Which shows two correct drawings?

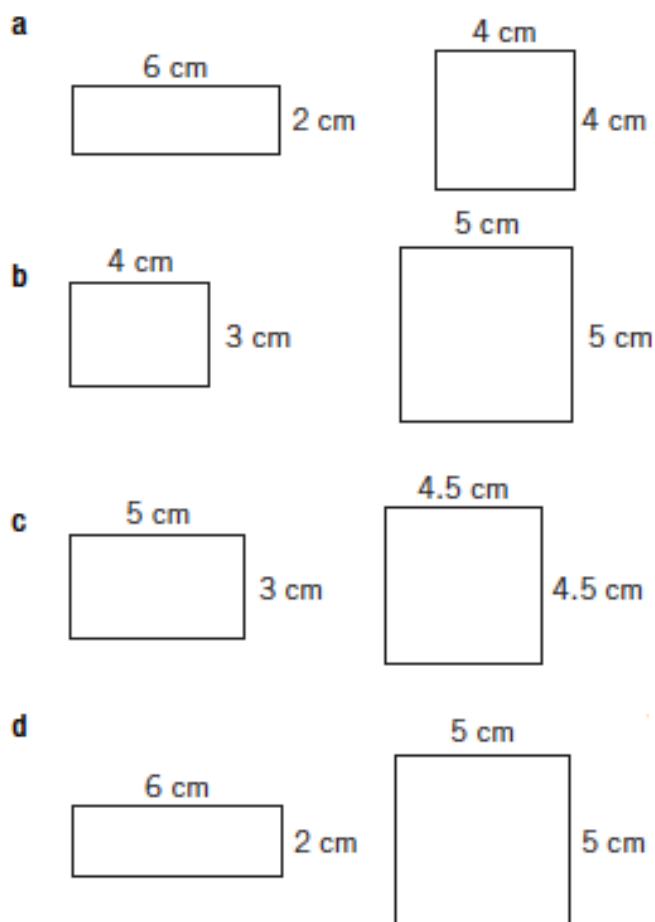

6. Cynthia purchases a tent for her camping trip, as show below. During one night of the camping trip, it rains. The floor of the tent is the only part that stays dry.

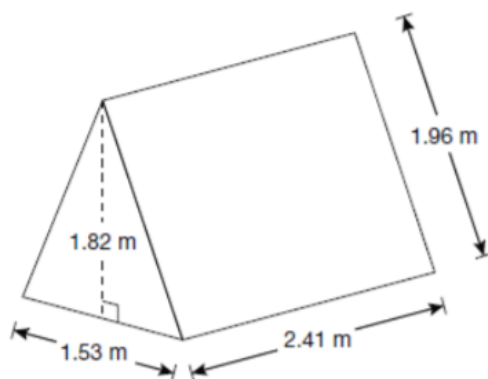

*What is the area of the part of Cynthia's tent that gets wet?*

- a.  $10.84 \text{ m}^2$
- b.  $12.23 \text{ m}^2$
- c.  $15.01 \text{ m}^2$
- d.  $16.96 \text{ m}^2$

**7. How many minutes are in 365 days?**

- a. 8760 minutes
- b. 21 900 minutes
- c. 262 800 minutes
- d. 525 600 minutes

**8. Look at the numbers below.**

$$\frac{3}{2}, \frac{5}{8}, \frac{9}{4}, 1\frac{7}{8}$$

*Which list shows these numbers ordered from smallest to largest?*

a.  $\frac{5}{8}, \frac{3}{2}, 1\frac{7}{8}, \frac{9}{4}$

b.  $\frac{5}{8}, \frac{3}{2}, \frac{9}{4}, 1\frac{7}{8}$

c.  $\frac{3}{2}, \frac{5}{8}, 1\frac{7}{8}, \frac{9}{4}$

d.  $\frac{3}{2}, \frac{9}{4}, \frac{5}{8}, 1\frac{7}{8}$

(turn to the following page...)

9. The terms of a pattern are made using toothpicks. Term 1 and Term 5 are not shown.

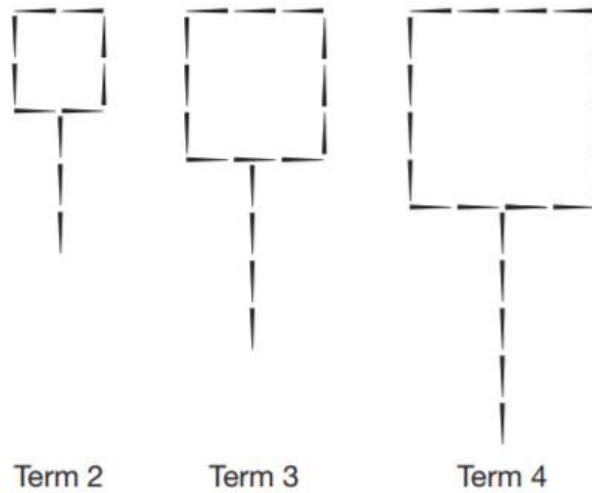

a. How many toothpicks are used to build the first term?

b. How many tooth picks are used to build the 5<sup>th</sup> term?

c. How many toothpicks are used to build the 25<sup>th</sup> term?
