# Supplementary material
Source: MDPI journal article supplement (https://www.mdpi.com/2227-7102/13/3/307)
Supplement: s1 [file s1]

1. Mrs. Smyte records the number of people in the school gym every hour during a school day. The data she collects show a maximum of 100 people. Which of the following is an appropriate scale for the graph?

- a. Increasing by 1 (0,1,2,3,4,...)
- b. Increasing by 2's (0,2,4,6...)
- c. Increasing by 10's (0, 10,20, 30...)

2. A student collects apples over a 5-day period.

| Day | Apples |
|-----|--------|
| 1   | 5      |
| 2   | 6      |
| 3   | 4      |
| 4   | 3      |
| 5   | 7      |

*What is the median number of apples that the student collected?*

3. Use the map and key below to complete the grid and answer the questions.

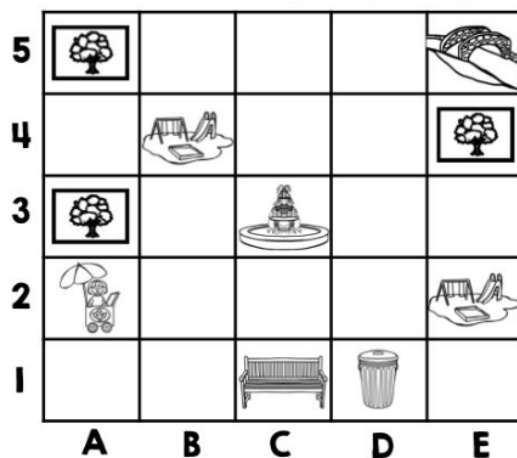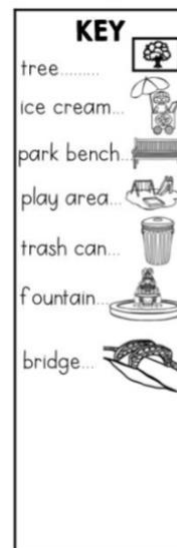

a. Name the location of each item on the map.

|                   |            |
|-------------------|------------|
| play area: B4, E2 | ice cream: |
| trash can:        | fountain:  |
| park bench:       | tree:      |

- b. Add the following items to the map key by drawing a picture and labeling them. Draw the items anywhere on the map and name the location.

|                      |                    |
|----------------------|--------------------|
| <b>restroom:</b>     | <b>bike trail:</b> |
| <b>cotton candy:</b> | <b>balloons:</b>   |

4. Which image demonstrates a reflection?

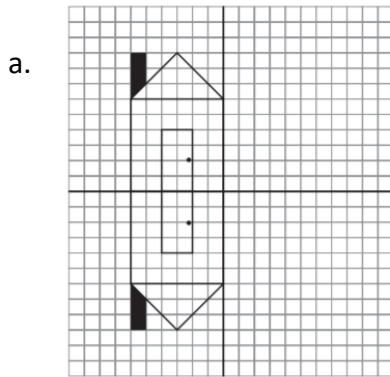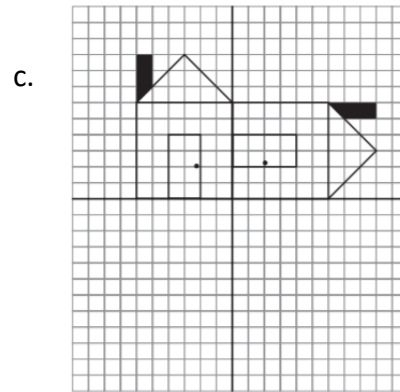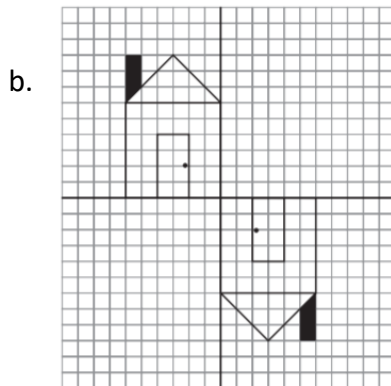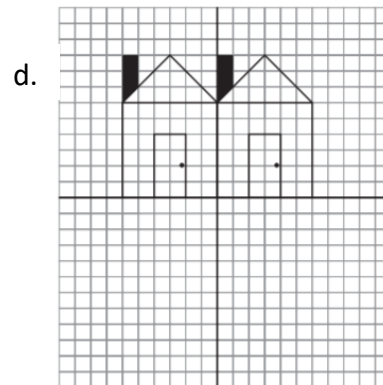

5. Which is the most appropriate unit of measurement to describe the area of the floor of a gym?

- a.  $\text{km}^2$
- b.  $\text{cm}^3$
- c.  $\text{m}^2$
- d.  $\text{m}^3$

6. Build a rectangle with a length of 9 cm and a width of 1 cm and record the area.

*Now, build a rectangle that has a side length of one less cm and a side width of one more cm.*

*What do you notice about the area?*

7. How many minutes are in 5 hours?

- a. 65 minutes
- b. 120 minutes
- c. 300 minutes
- d. 240 minutes

8. Look at the numbers below:

$$\frac{1}{5} \text{ or } \frac{1}{4}$$

*Which fraction is the largest?*

- a.  $\frac{1}{5}$
- b.  $\frac{1}{4}$

9. The terms of a pattern are made using toothpicks. Term 1 and Term 5 are not shown.

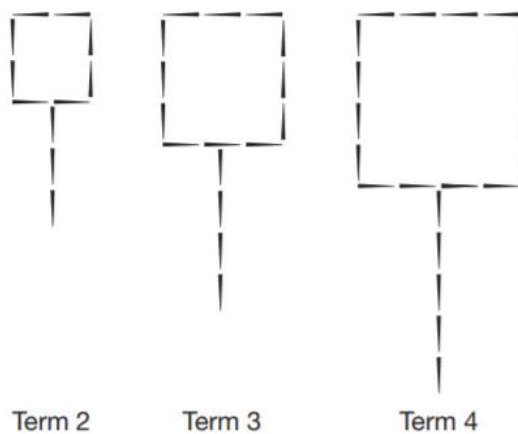

a. How many toothpicks are used to build the first term?

b. How many tooth picks are used to build the 5<sup>th</sup> term?
