# Supplementary material
Source: MDPI journal article supplement (https://www.mdpi.com/2227-7102/13/3/307)
Supplement: s1 [file s1]

Archive with 3 entries (3 files):
- Grade 5 Math Questions.pdf
- Grade 6 Math Questions.pdf
- Grade 7 Math Questions.pdf
